# Supplementary material
Source: publisher site journal article supplement (https://www.dovepress.com/article/570477)
Supplement: Supplementary file 1 [file 570477%20Revised%20Supplementary%20Material.docx]

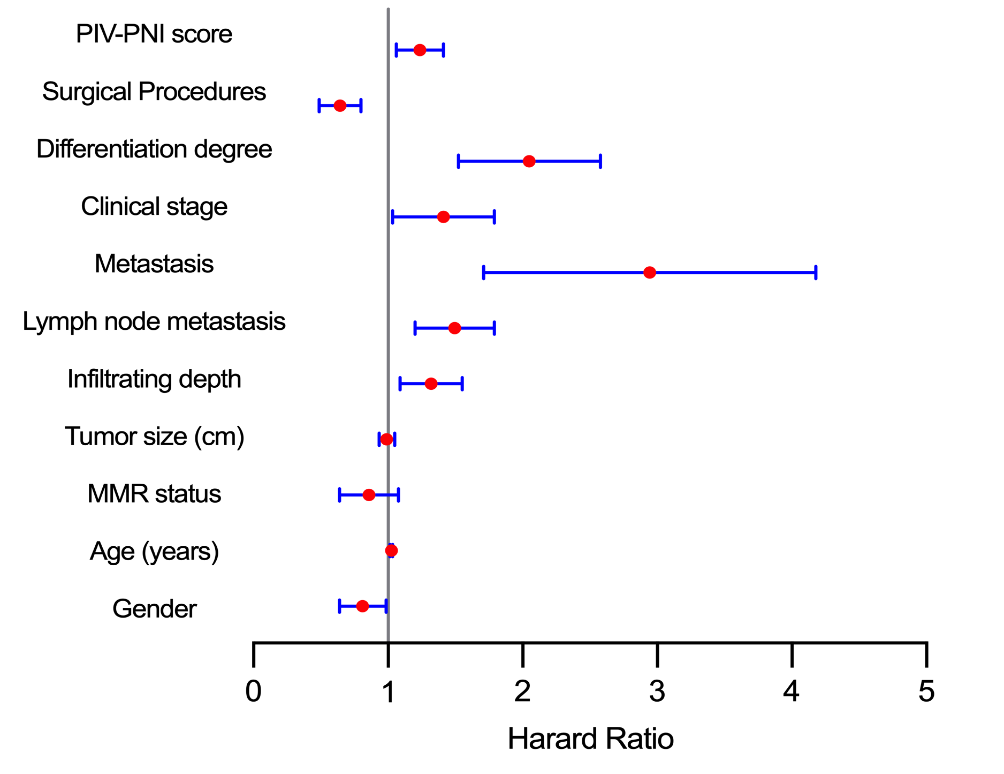
**Supplementary Figure 1**. Forest plot showing the hazard ratio of OS using the univariate Cox regression risk model.


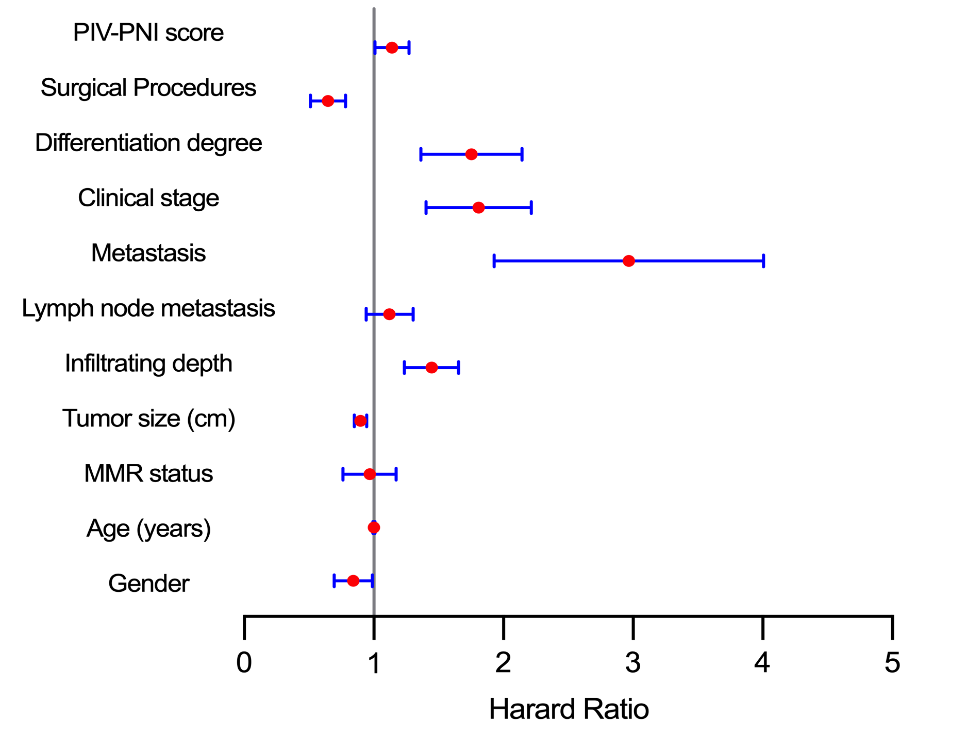
Abbreviations: MMR, Mismatch repair; PIV, Pan-immune-inflammation value; PNI, Prognostic nutritional index

**Supplementary Figure 2**. Forest plot showing the hazard ratio of OS using the multivariate Cox regression risk model.

Abbreviations: MMR, Mismatch repair; PIV, Pan-immune-inflammation value; PNI, Prognostic nutritional index

| **Variables** | **Overall (n=2116)** | **Train (n=1587)** | **Validation (n=529)** | ***p value*** |
| --- | --- | --- | --- | --- |
| **Gender** |  |  |  | 0.628 |
| Male | 1251(59.1%) | 933(58.8%) | 318(60.1%) |  |
| Female | 865(40.9%) | 654(41.2%) | 211(39.9%) |  |
| **Age (years)** |  |  |  | 0.567 |
| ≤ 60 | 961(45.4%) | 721(45.4%) | 240(45.4%) |  |
| > 60 | 1155(54.6%) | 866(54.6%) | 289(54.6%) |  |
| **Tumor size (cm)** |  |  |  | 0.295 |
| < 5.0 | 1418(67.0%) | 1063(66.9%) | 355(67.1%) |  |
| ≥ 5.0 | 698(33.0%) | 524(33.1%) | 174(32.9%) |  |
| **Infiltrating depth** |  |  |  | 0.464 |
| T1 | 131(6.2%) | 81(5.2%) | 50(9.5%) |  |
| T2 | 422(19.9%) | 325(20.4%) | 97(18.3%) |  |
| T3 | 1050(49.6%) | 803(50.6%) | 247(46.7%) |  |
| T4 | 513(24.3%) | 378(23.8%) | 135(25.5%) |  |
| **Lymph node** **metastasis** |  |  |  | 0.461 |
| N0 | 1264(59.8%) | 965(60.8%） | 299(56.5%) |  |
| N1 | 568(26.8%) | 419(26.4%） | 149(28.2%) |  |
| N2 | 284(13.4%) | 203(12.8%） | 81(15.3%) |  |
| **Metastasis** |  |  |  | 0.088 |
| M0 | 1985(93.8%) | 1496(94.3%) | 487(92.1%) |  |
| M1 | 133(6.2%) | 91(5.7%) | 42(7.9%) |  |
| **Clinical stage** |  |  |  | 0.698 |
| Ⅰ | 415(19.6%) | 302(19.1%) | 113(25.1%) |  |
| Ⅱ | 805(38.0%) | 610(38.4%) | 195(36.7%) |  |
| Ⅲ | 763(36.1%) | 574(36.1%) | 189(35.7%) |  |
| IV | 133(6.3%) | 101(6.4%) | 32(6.0%) |  |
| **Differentiation degree** |  |  |  | 0.970 |
| Poorly | 1849(87.4%) | 1386(87.3%) | 463(87.5%) |  |
| Well-Moderately | 267(12.6%) | 201(12.7%) | 66(12.5%) |  |
| **Surgical Procedures** |  |  |  | 0.919 |
| Laparoscopic | 351(16.6%) | 262(16.5%) | 89(16.8%) |  |
| Laparotomy | 1325(83.4%) | 1325(83.5%) | 440(83.2%) |  |
| **PIV-PNI score** |  |  |  | 0.660 |
| 0 | 682(32.2%) | 502(31.6%) | 180(34.0%) |  |
| 1 | 795(37.6%) | 601(37.9%) | 194(36.7%) |  |
| 2 | 639(30.2%) | 484(30.5%) | 155(29.3%) |  |

**Supplementary Table 1.** Characteristics of CRC patients divided into train cohort and validation cohort

**Abbreviations:** PIV, Pan-immune-inflammation value; PNI, Prognostic Nutritional Index; CRC, Colorectal cancer
